# Supplementary material for: Capillary electrophoresis coupled to MALDI mass spectrometry imaging with large volume sample stacking injection for improved coverage of C. borealis neuropeptidome
Source: Royal Society of Chemistry journal article supplement (doi:10.1039/c9an01883b), 2019-11-06
Supplement: c9an01883b1.pdf [file c9an01883b1.pdf]

## Electronic Supplementary Information

### Capillary Electrophoresis Coupled to MALDI Mass Spectrometry Imaging with Large Volume Sample Stacking Injection for Improved Coverage of *C. borealis* Neuropeptidome

Kellen DeLaney<sup>1</sup> and Lingjun Li<sup>1,2,\*</sup>

<sup>1</sup>Department of Chemistry, University of Wisconsin-Madison, 1101 University Avenue,  
Madison, WI 53706-1322

<sup>2</sup>School of Pharmacy, University of Wisconsin-Madison, 777 Highland Avenue, Madison, WI  
53705-2222

\*To whom correspondence should be addressed. E-mail: [lingjun.li@wisc.edu](mailto:lingjun.li@wisc.edu). Phone: (608)265-8491, Fax: (608)262-5345. Mailing Address: 5125 Rennebohm Hall, 777 Highland Avenue, Madison, WI 53706-2222

## Methods

### *LC-ESI-MS parameters*

For LC-ESI-MS analysis, an Orbitrap Elite (Thermo Scientific, Bremen, Germany) with a nano-ESI source coupled to a Waters nanoAcquity LC system (Waters Corp, Milford, MA, USA) was used for analysis. Samples were dissolved in 15  $\mu\text{L}$  0.1% FA and 2  $\mu\text{L}$  was injected onto a self-packed C18 column (75  $\mu\text{m}$  inner diameter and 1.7  $\mu\text{m}$  particle size). The flow rate was set to 0.300  $\mu\text{L}/\text{min}$ . LC separation was carried out with water with 0.1% FA (A) and acetonitrile with 0.1% FA (B) as mobile phases. A two-hour gradient was implemented as follows: 0-1 min 3-10% B; 1-90 min 10-35% B; 90-92 min 35-95% B; 92-102 min 95% B; 102-105 min 95-3% B; 105-120 min 3% B. MS acquisition was carried out in positive mode from  $m/z$  200 to 1600 with a resolution of 120,000.

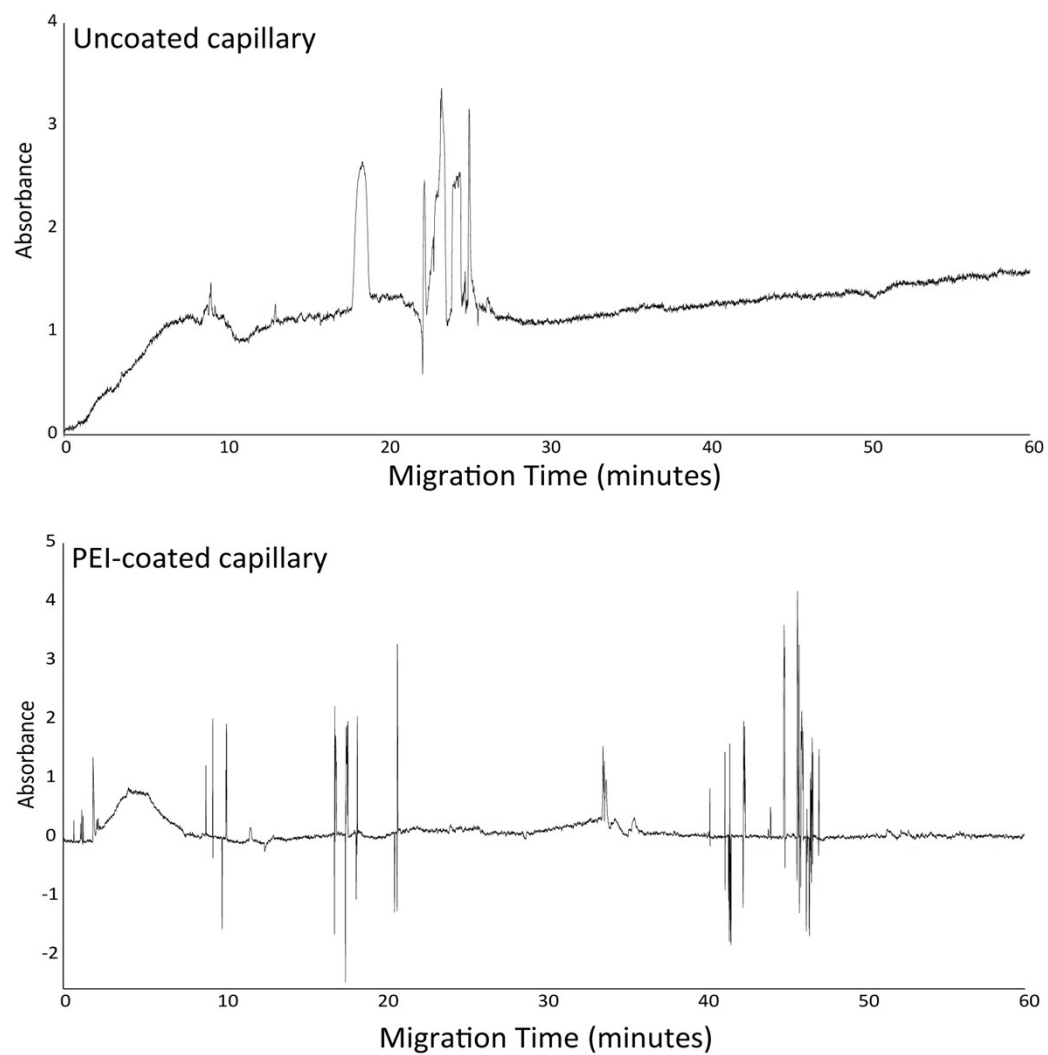

**Figure S1.** Electropherograms of brain tissue extract separated with an uncoated capillary (top) and a capillary coated with polyethylimine (PEI), using a UV detector at a wavelength of 240 nm.
